# Supplementary material
Source: publisher site journal article supplement (https://www.dovepress.com/article/328617)
Supplement: Supplementary file 1 [file get_supplementary_file.php]

**Supplemental Materials**

**Supplemental table 1 Absolute numbers and prevalence of anxiety and depression in this study**

|  | | **Participants** | |  |  | **GOLD Stage in COPD** | | | |
| --- | --- | --- | --- | --- | --- | --- | --- | --- | --- |
| **Non-COPD** | **COPD** | **P** |  | **I** | **II** | **III-IV** | **P** |
| **44367 (90.45%)** | **4686 (9.55%)** | **2600 (55.48%)** | **1717 (36.64%)** | **369 (7.87%)** |
| **Anxiety** | **total** | 4139 (9.33%) | 509 (10.86%) | 0.001 |  | 253 (9.73%) | 190 (11.07%) | 66 (17.89%) | < 0.001 |
| **mild** | 3114 (7.02%) | 384 (8.19%) | 0.003 |  | 190 (7.31%) | 145 (8.44%) | 49 (13.28%) | < 0.001 |
| **moderate** | 915 (2.06%) | 114 (2.43%) | 0.092 |  | 59 (2.27%) | 39 (2.27%) | 16 (4.34%) | 0.047 |
| **severe** | 110 (0.25%) | 11 (0.23%) | 0.863 |  | 4 (0.15%) | 6 (0.35%) | 1 (0.27%) | 0.381 |
| **Depression** | **total** | 4879 (11.00%) | 649 (13.85%) | < 0.001 |  | 324 (12.46%) | 243 (14.15%) | 82 (22.22%) | < 0.001 |
| **mild** | 3194 (7.20%) | 430 (9.18%) | < 0.001 |  | 212 (8.15%) | 163 (9.49%) | 55 (14.91%) | < 0.001 |
| **moderate** | 1594 (3.59%) | 204 (4.35%) | 0.008 |  | 105 (4.04%) | 74 (4.31%) | 25 (6.78%) | 0.054 |
| **severe** | 91 (0.21%) | 15 (0.32%) | 0.107 |  | 7 (0.27%) | 6 (0.35%) | 2 (0.54%) | 0.511 |
| **Anxiety or depression** | **total** | 3802 (8.57%) | 482 (10.29%) | < 0.001 |  | 257 (9.88%) | 161 (9.38%) | 64 (17.34%) | < 0.001 |
| **Anxiety and depression** | **total** | 2608 (5.88%) | 338 (7.21%) | < 0.001 |  | 160 (6.15%) | 136 (7.92%) | 42 (11.38%) | < 0.001 |

%: percentage

＜: lower than

COPD: chronic obstructive pulmonary disease

GOLD: Global Initiative for Chronic Obstructive Lung Disease

**Supplemental table 2 Characteristics of patients with COPD (n = 4686) with and without anxiety/depression**

|  | **Anxiety**  **(n=509)** | **No Anxiety**  **(n=4177)** | **P** | **Depression**  **(n=649)** | **No Depression**  **(n=4037)** | **P** |
| --- | --- | --- | --- | --- | --- | --- |
| **Age, median (IQR), years** | 61.00 (14.00) | 61.00 (14.00) | 0.940 | 63.00 (14.00) | 61.00 (15.00) | < 0.001 |
| **Female, n (%)** | 226 (44.40) | 1520 (36.40) | < 0.001 | 274 (42.22) | 1472 (36.46) | 0.005 |
| **BMI, median (IQR), kg/m2** | 23.28 (5.25) | 23.66 (4.46) | 0.024 | 23.31 (5.13) | 23.66 (4.47) | 0.024 |
| **High school or above, n (%)** | 94 (18.47) | 1040 (24.50) | 0.001 | 110 (16.95) | 1024 (25.37) | < 0.001 |
| **Currently married, n (%)** | 454 (89.19) | 3768 (90.21) | 0.470 | 574 (88.44) | 3648 (90.36) | 0.128 |
| **Currently employed, n (%)** | 155 (30.45) | 1918 (45.92) | < 0.001 | 211 (32.51) | 1862 (46.12) | < 0.001 |
| **Family income, median (IQR), ten thousand yuan/year** | 2.00 (2.00) | 3.00 (4.00) | < 0.001 | 2.00 (3.00) | 3.00 (4.00) | < 0.001 |
| **Smoking status** |  |  | 0.202 |  |  | 0.014 |
| **Current smoker, n (%)** | 185 (36.35) | 1537 (36.80) |  | 216 (33.28) | 1506 (37.30) |  |
| **Ex-smoker, n (%)** | 54 (17.48) | 551 (13.19) |  | 72 (11.09) | 533 (13.20) |  |
| **Never smoker, n (%)** | 270 53.05) | 2089 (50.01) |  | 361 (55.62) | 1998 (49.49) |  |
| **Smoking index, median (IQR), pack-years** | 0.00 (26.00) | 0.00 (30.00) | 0.067 | 0.00 (26.00) | 0.00 (30.00) | 0.009 |
| **Comorbidity** |  |  |  |  |  |  |
| **Coronary heart disease, n (%)** | 23 (4.52) | 128 (3.06) | 0.079 | 33 (5.08) | 118 (2.92) | 0.004 |
| **Stroke, n (%)** | 7 (1.38) | 46 (1.10) | 0.581 | 13 (2.00) | 40 (0.99) | 0.024 |
| **Hypertension, n (%)** | 55 (10.81) | 498 (11.92) | 0.461 | 78 (12.02) | 475 (11.77) | 0.853 |
| **Diabetes, n (%)** | 13 (2.55) | 155 (3.71) | 0.185 | 22 (3.39) | 146 (3.62) | 0.773 |
| **Malignancy, n (%)** | 1 (0.20) | 7 (0.17) | 0.602 | 0 (0.00) | 8 (0.20) | 0.609 |
| **Respiratory symptom** |  |  |  |  |  |  |
| **Cough, n (%)** | 118 (23.18) | 650 (15.56) | < 0.001 | 132 (20.34) | 636 (15.75) | 0.003 |
| **Sputum, n (%)** | 151 (29.67) | 864 (20.68) | < 0.001 | 169 (26.04) | 846 (20.96) | 0.004 |
| **Wheeze, n (%)** | 130 (25.54) | 591 (14.15) | < 0.001 | 148 (22.80) | 573 (14.19) | < 0.001 |
| **Dyspnea, n (%)** | 146 (28.68) | 687 (16.45) | < 0.001 | 162 (24.96) | 671 (16.62) | < 0.001 |
| **At least one symptom, n (%)** | 247 (48.53) | 1543 (36.94) | < 0.001 | 290 (44.68) | 1500 (37.16) | < 0.001 |
| **Lung function measures** |  |  |  |  |  |  |
| **FEV1, median (IQR), L** | 1.91 (1.04) | 2.08 (0.95) | < 0.001 | 1.88 (1.01) | 2.09 (0.95) | < 0.001 |
| **FEV1%pred, median (IQR), %** | 79.77 (30.00) | 83.27 (26.00) | < 0.001 | 80.08 (28.00) | 83.33 (26.00) | 0.001 |
| **FEV1/FVC, median (IQR), %** | 63.50 (13.66) | 64.47 (9.89) | 0.004 | 63.58 (12.42) | 64.50 (9.85) | 0.006 |
| **HADS Score** |  |  |  |  |  |  |
| **Anxiety Score, median (IQR)** | 9.00 (2.00) | 2.00 (4.00) | < 0.001 | 8.00 (3.00) | 2.00 (4.00) | < 0.001 |
| **Depression Score, median (IQR)** | 9.00 (4.00) | 2.00 (4.00) | < 0.001 | 10.00 (2.00) | 2.00 (4.00) | < 0.001 |

＜: lower than

95%CI: 95% Confidence Interval

BMI: body mass index

FEV1: forced expiratory volume in 1 s

FEV1%pred: ratio of observed to predicted FEV1

FEV1/FVC: FEV1: forced vital capacity ratio

HADS: Hospital Anxiety and Depression Scale

IQR: interquartile range
